# Supplementary material
Source: MDPI journal article supplement (https://www.mdpi.com/1996-1073/12/10/2033)
Supplement: s1 [file s1]

Supplementary material:

**Table S1.** Methods for expanding electricity and utilities, based on [1].

| Characteristics                           | Grid Electricity                                                                         | Off-grid Electricity                                                           |                                            |                                           |
|-------------------------------------------|------------------------------------------------------------------------------------------|--------------------------------------------------------------------------------|--------------------------------------------|-------------------------------------------|
| System type                               | Centralized                                                                              | Minigrids                                                                      | Microgrids                                 | Nanogrids                                 |
| Size                                      | Large Cities, small cities, regional and multi countries                                 | Communities                                                                    |                                            | Individual houses                         |
| Example                                   | Paris(Fr), Amsterdam(NL), Bogotá(COL), México city (MEX), Madrid(SPA), Nairobi(KEN) etc. | American Samoa (US) [2], San Andres Island(COL) [3], Hawaii(USA), Among others | Heeten (NL) [4], Pecan Street TX (US) [5], | Partly implemented yet for all year round |
| Area that can cover                       | Lager than 50 km <sup>2</sup>                                                            | 8 to 49 km <sup>2</sup>                                                        | 3 to 8 km <sup>2</sup>                     | <1 km <sup>2</sup>                        |
| People benefit                            | 100.000 to millions                                                                      | 10.000 to 100.000                                                              | 1000 to 10.000                             | Usually 1 to 1000                         |
| Energy capacity                           | >10 MW                                                                                   | <10 MW                                                                         | <100 kW                                    | <20 kW                                    |
| Type of technology use                    | Power plants in large scale and centralized                                              | Smaller power plants in Medium scale and small scale                           |                                            | Smallest scale                            |
| Approximately Required investment in Euro | Billions                                                                                 | Hundreds of Thousands to Billion                                               |                                            | Thousands                                 |

Measures to facilitate the implementation of off-grid electricity

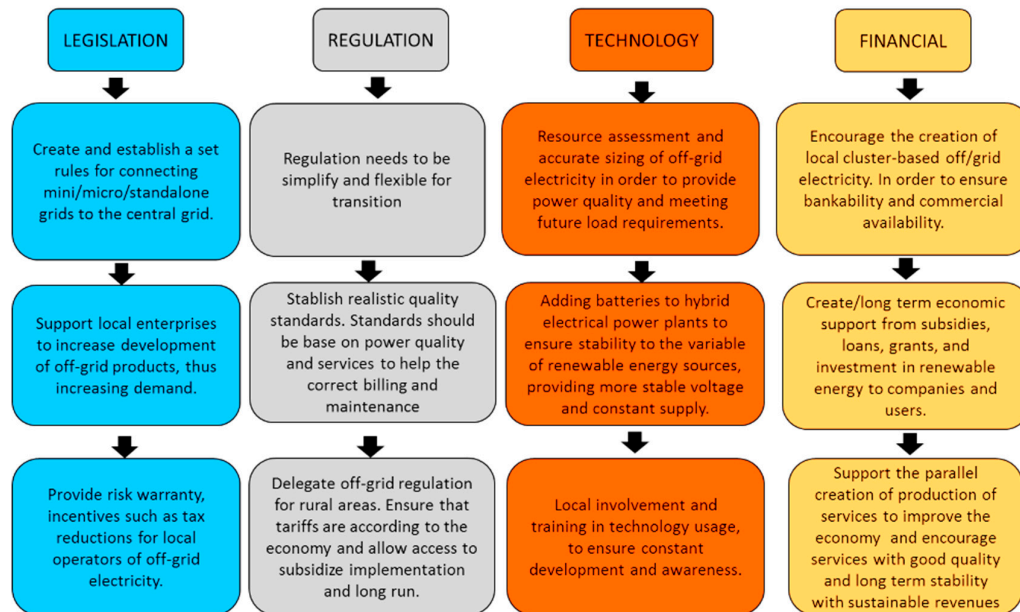

**Figure S1.** Measures to facilitate the implementation of off-grid electricity, adapted from Energy Access Report and Clean Energy Ministerial 2013 [1,6].

**References**

1. World Bank. State of electricity access report 2017 (Vol. 2): full report (English). Available online: <http://documents.worldbank.org/curated/en/364571494517675149/pdf/114841-REVISED-JUNE12-FINAL-SEAR-web-REV-optimized.pdf> (accessed on 7 January 2018).
2. EPA - West Coast Collaborative. DERA 2016: American Samoa Achieves 100% Renewable

Energy on Ta'u Island. Available online:

<https://www.westcoastcollaborative.org/files/grants/2016/american-samoa-solar-storage-factsheet-2016.pdf> (accessed on 10 January 2018)

3. United States. Department of Energy. *Energy Transition Initiative: Island Energy Snapshot - San Andres and Providencia (Fact Sheet)*, NREL (National Renewable Energy Laboratory); United States. Department of Energy: Washington DC, USA, 2015; pp. 1–4.
4. Laan, M. Van Der. GridFlex Heeten investigates feasibility of local energy market. Available online: [https://ict.eu/wp-content/uploads/2018/10/ICT-GROUP\\_Casestudy-Energy-GFH\\_UK\\_Dig.pdf](https://ict.eu/wp-content/uploads/2018/10/ICT-GROUP_Casestudy-Energy-GFH_UK_Dig.pdf) (accessed on 11 January 2018).
5. PECAN STREET – Pecan Street Inc. Available online: <http://www.pecanstreet.org/> (accessed on 8 March 2017).
6. Sanchez, D.L.; Sivaram, V. Saving innovative climate and energy research: Four recommendations for Mission Innovation. *Energy Res. Soc. Sci.* **2017**, *29*, 123–126, doi:10.1016/j.ERSS.2017.05.022.
